# Supplementary material for: Terminal nickel(ii) amide, alkoxide, and thiolate complexes containing amido diphosphine ligands of the type [N(o-C6H4PR2)2]− (R = Ph, iPr, Cy)
Source: Royal Society of Chemistry journal article supplement (doi:10.1039/b719894a), 2008-01-01
Supplement: b719894a.pdf [file b719894a.pdf]

## Electronic Supplementary Information

### Terminal Nickel(II) Amide, Alkoxide, and Thiolate Complexes Containing Amido Diphosphine Ligands of the Type $[N(o-C_6H_4PR_2)_2]^-$ (R = Ph, <sup>i</sup>Pr, Cy)

Lan-Chang Liang,\* Pin-Shu Chien, Pei-Ying Lee, Jia-Ming Lin, and Yu-Lun Huang

#### Contents

**Figure S1.** <sup>1</sup>H NMR spectrum (500 MHz) of [Ph-PNP]Ni(NHPh) in C<sub>6</sub>D<sub>6</sub> at room temperature

**Figure S2.** <sup>31</sup>P{<sup>1</sup>H} NMR spectrum (202 MHz) of [Ph-PNP]Ni(NHPh) in C<sub>6</sub>D<sub>6</sub> at room temperature

**Figure S3.** <sup>13</sup>C{<sup>1</sup>H} NMR spectrum (125.7 MHz) of [Ph-PNP]Ni(NHPh) in C<sub>6</sub>D<sub>6</sub> at room temperature

**Figure S4.** <sup>1</sup>H NMR spectrum (500 MHz) of [Ph-PNP]Ni(NH<sup>t</sup>Bu) in C<sub>6</sub>D<sub>6</sub> at room temperature

**Figure S5.** <sup>31</sup>P{<sup>1</sup>H} NMR spectrum (202 MHz) of [Ph-PNP]Ni(NH<sup>t</sup>Bu) in C<sub>6</sub>D<sub>6</sub> at room temperature

**Figure S6.** <sup>13</sup>C{<sup>1</sup>H} NMR spectrum (125.7 MHz) of [Ph-PNP]Ni(NH<sup>t</sup>Bu) in C<sub>6</sub>D<sub>6</sub> at room temperature

**Figure S7.** <sup>1</sup>H NMR spectrum (500 MHz) of [Ph-PNP]Ni(O<sup>t</sup>Bu) in C<sub>6</sub>D<sub>6</sub> at room temperature

**Figure S8.** <sup>31</sup>P{<sup>1</sup>H} NMR spectrum (202 MHz) of [Ph-PNP]Ni(O<sup>t</sup>Bu) in C<sub>6</sub>D<sub>6</sub> at room temperature

**Figure S9.** <sup>13</sup>C{<sup>1</sup>H} NMR spectrum (125.7 MHz) of [Ph-PNP]Ni(O<sup>t</sup>Bu) in C<sub>6</sub>D<sub>6</sub> at room temperature

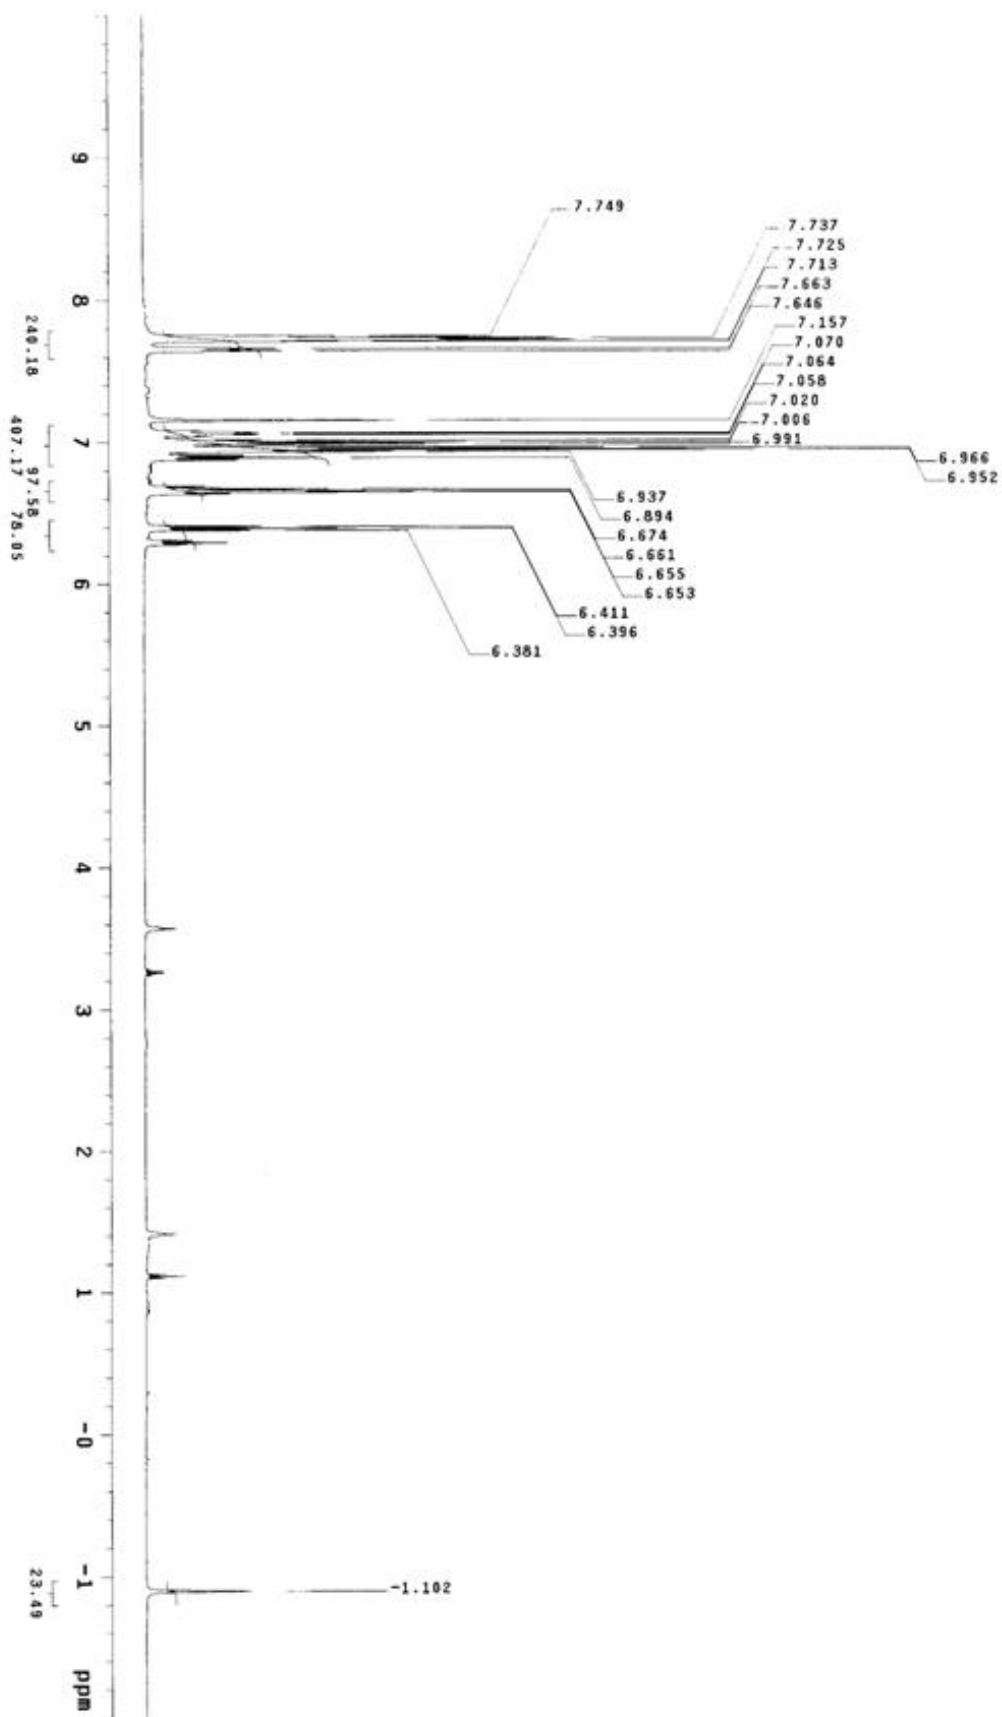

Figure S1.  $^1\text{H}$  NMR spectrum (500 MHz) of  $[\text{Ph-PNP}]\text{Ni}(\text{NHPh})$  in  $\text{C}_6\text{D}_6$  at room temperature

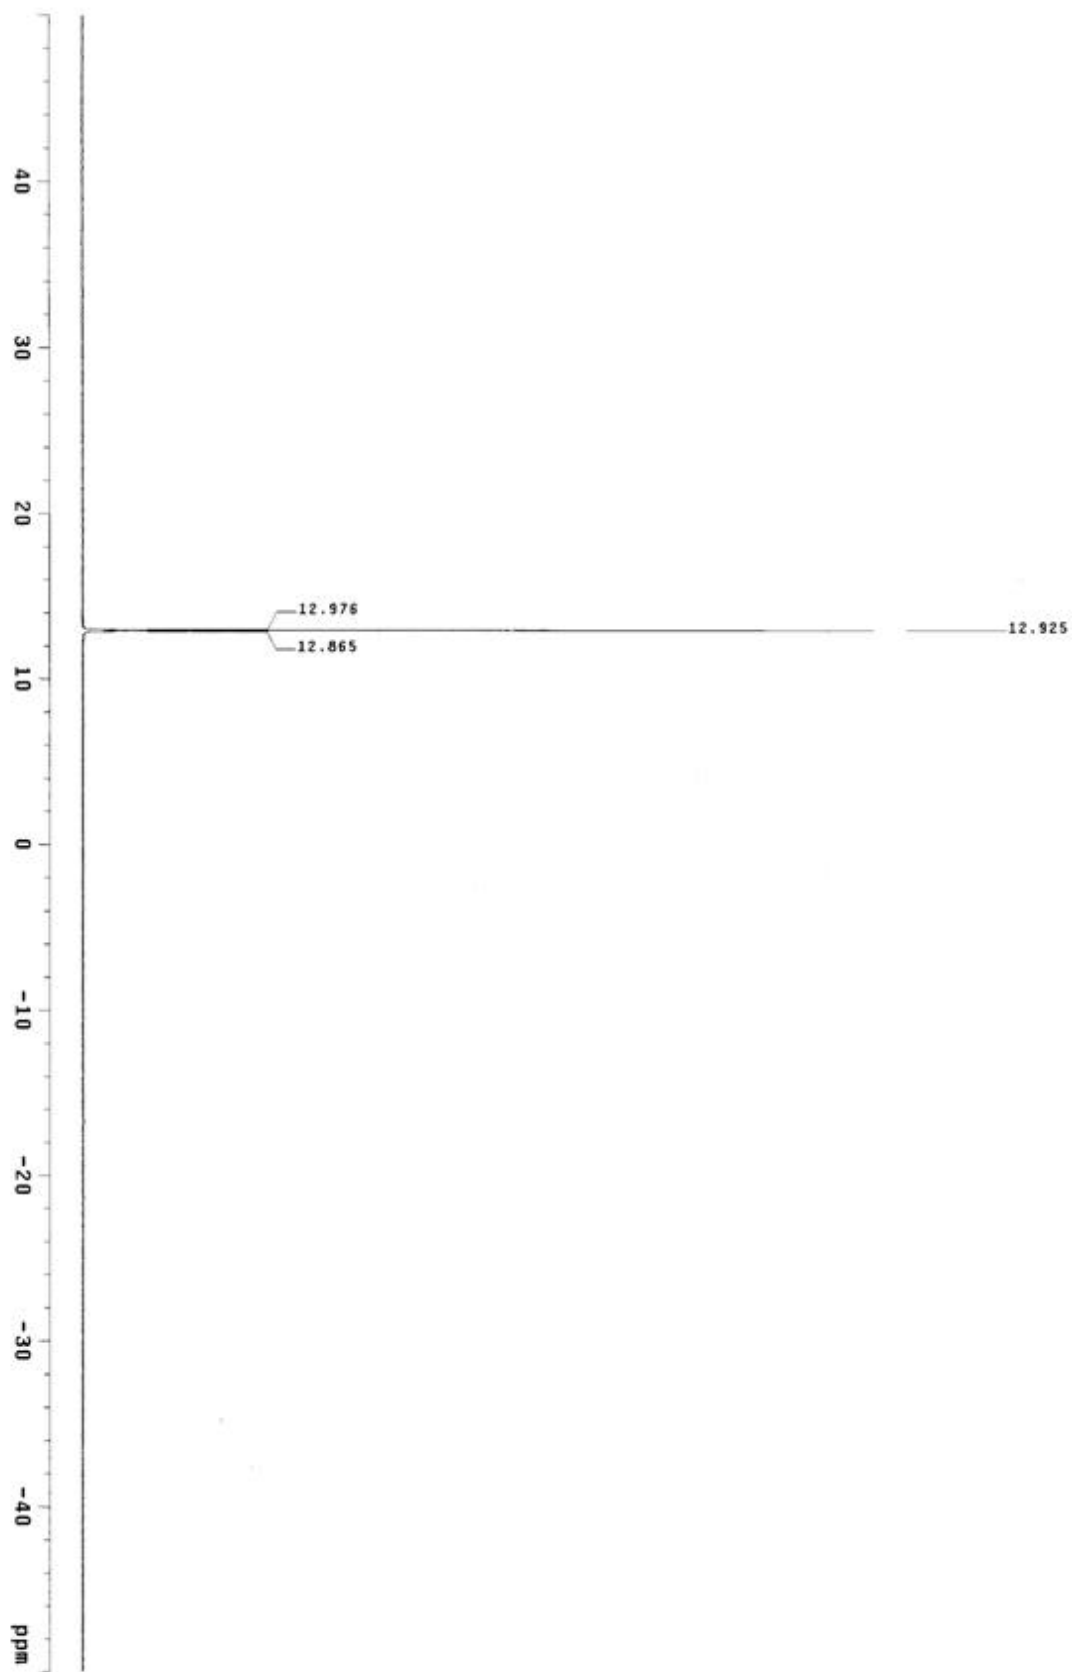

**Figure S2.**  $^{31}\text{P}\{^1\text{H}\}$  NMR spectrum (202 MHz) of  $[\text{Ph-PNP}]\text{Ni}(\text{NHPh})$  in  $\text{C}_6\text{D}_6$  at room temperature

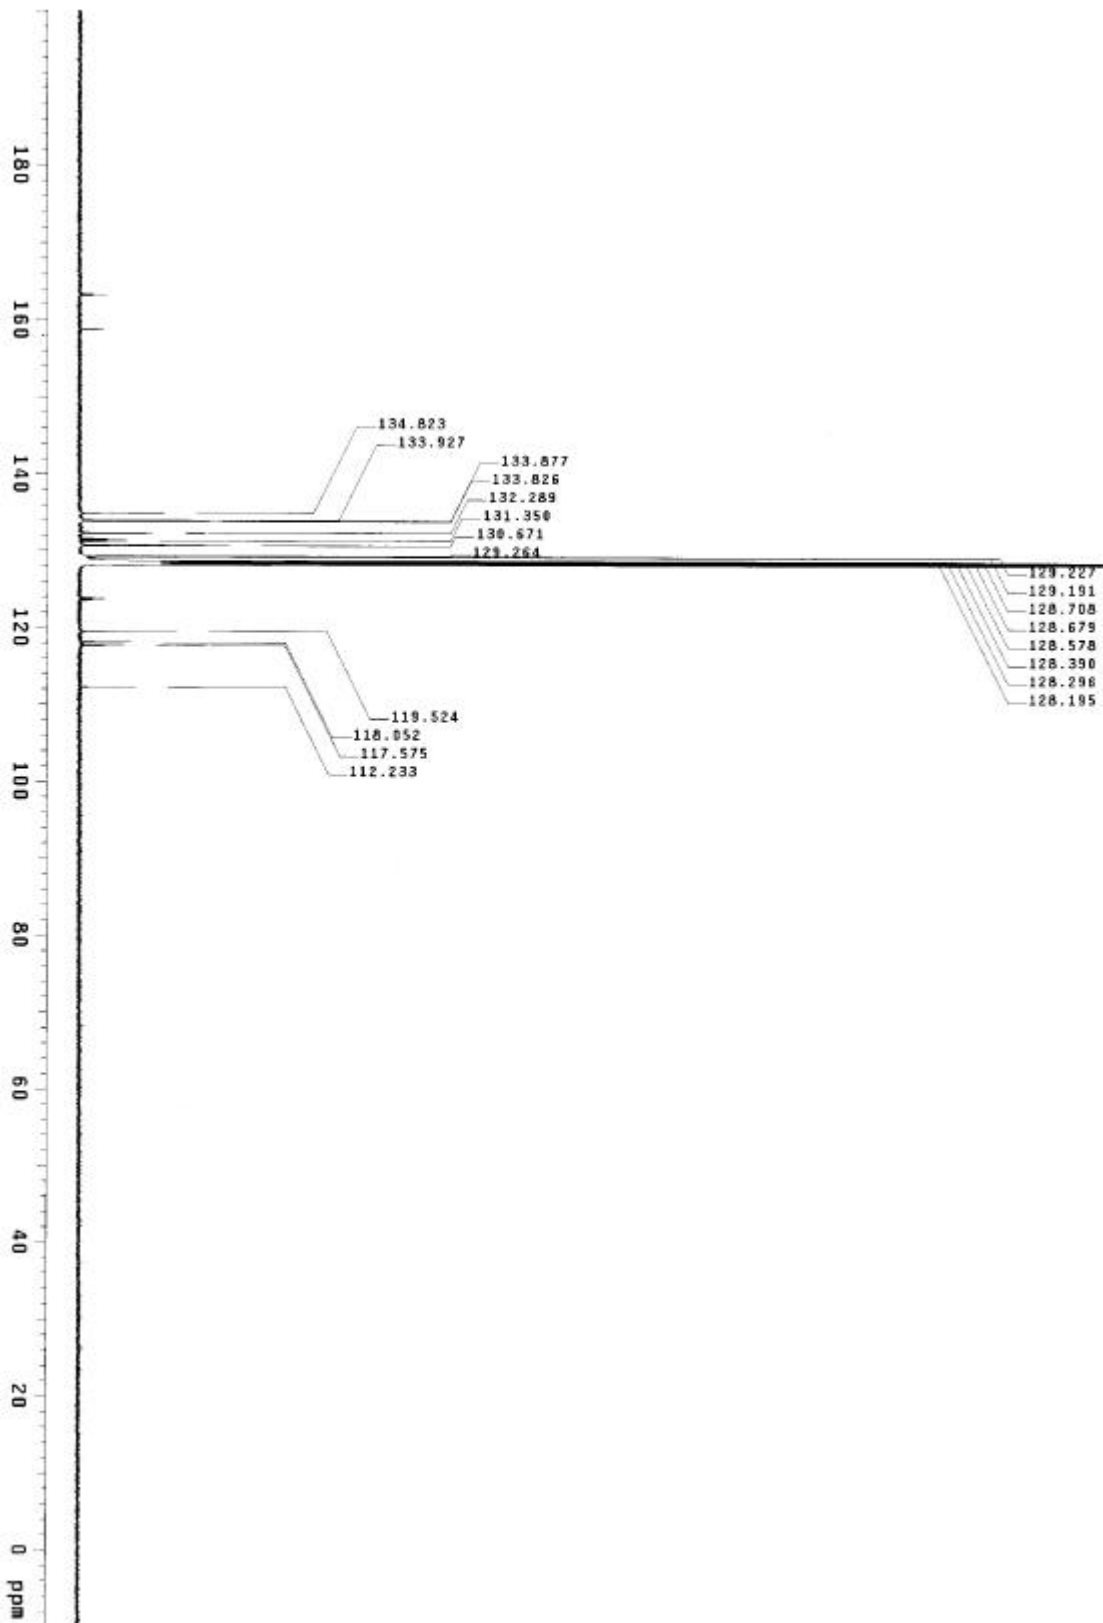

**Figure S3.**  $^{13}\text{C}\{^1\text{H}\}$  NMR spectrum (125.7 MHz) of  $[\text{Ph-PNP}]\text{Ni}(\text{NHPh})$  in  $\text{C}_6\text{D}_6$  at room temperature

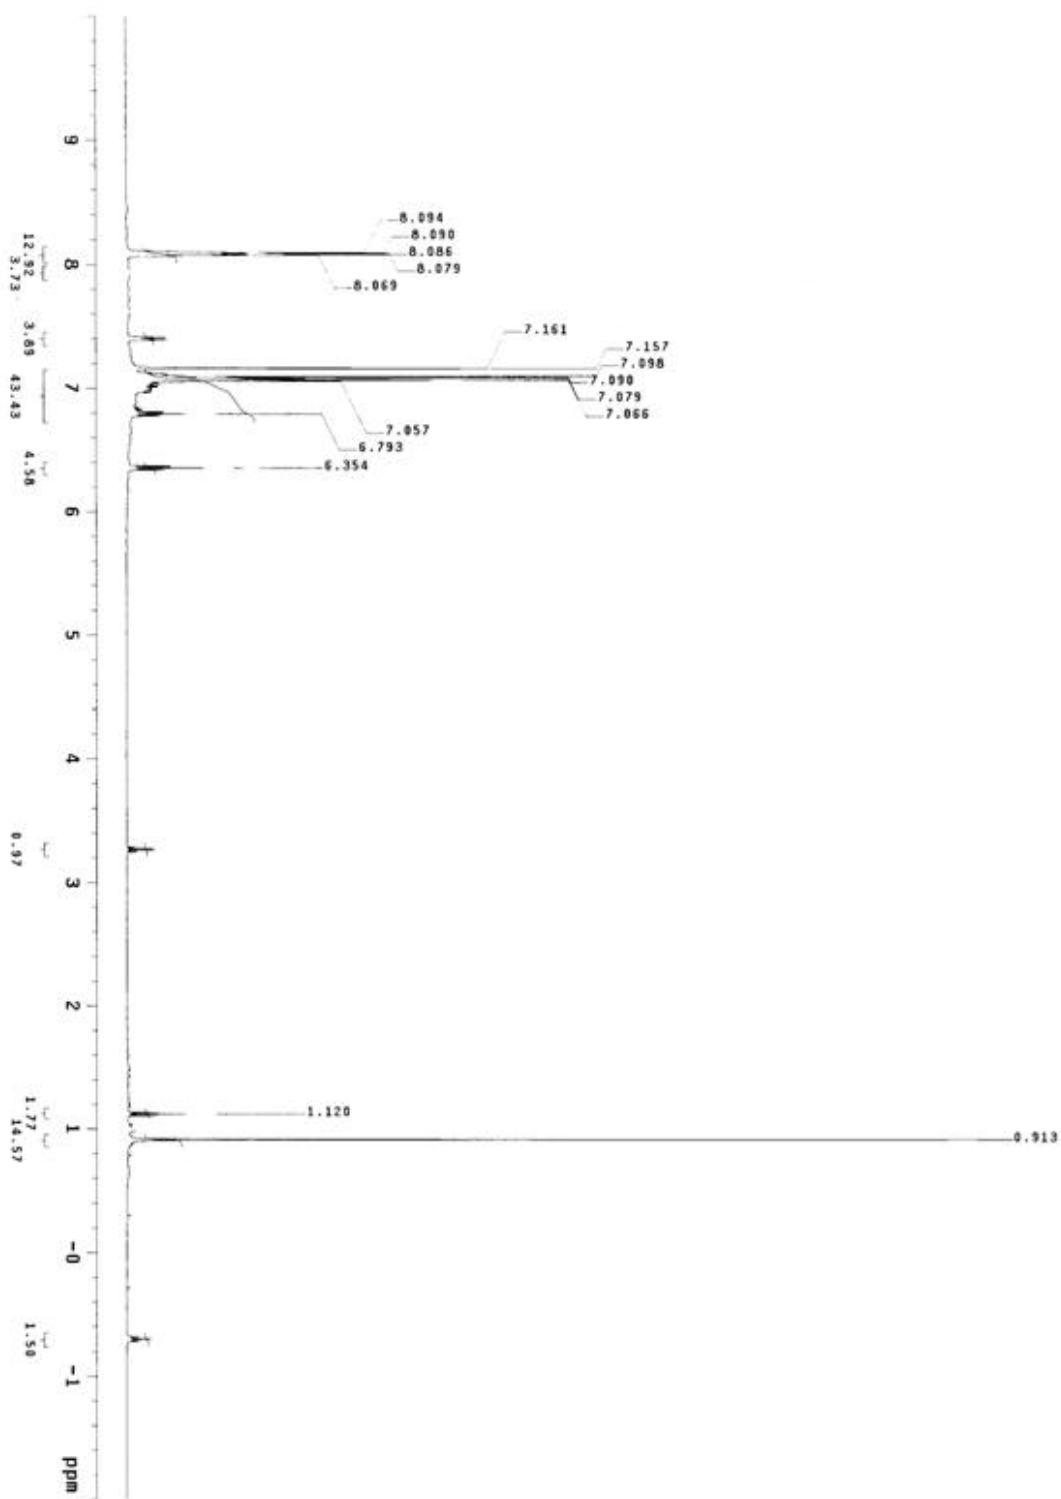

**Figure S4.**  $^1\text{H}$  NMR spectrum (500 MHz) of  $[\text{Ph-PNP}]\text{Ni}(\text{NH}^t\text{Bu})$  in  $\text{C}_6\text{D}_6$  at room temperature

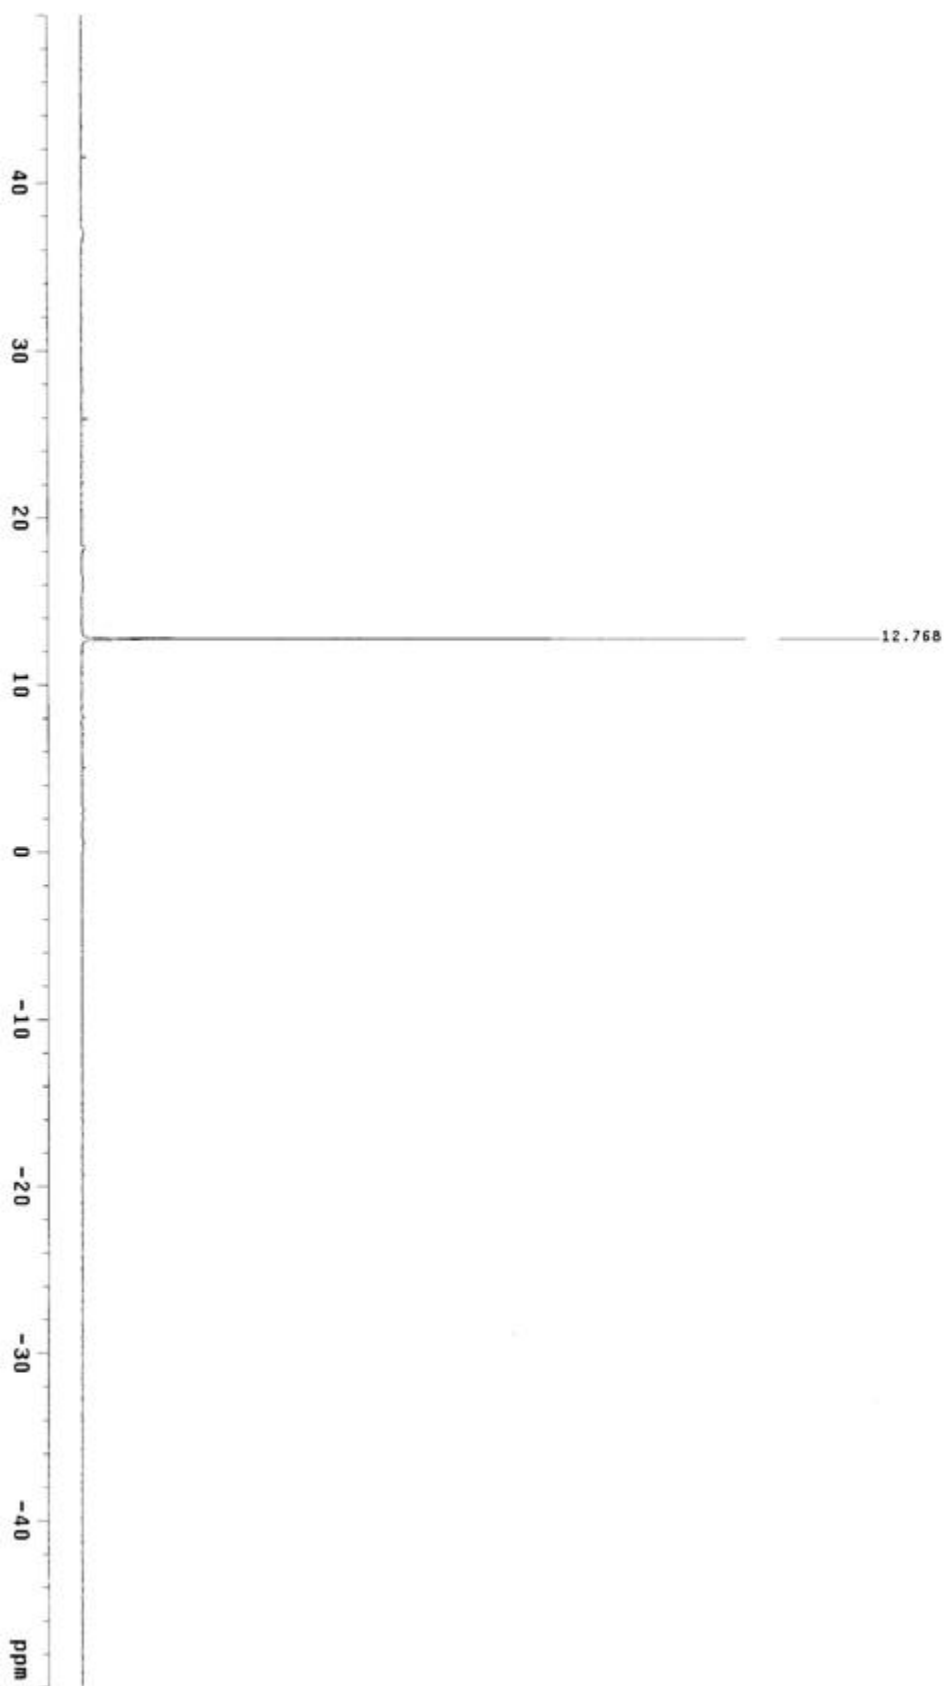

**Figure S5.**  $^{31}\text{P}\{^1\text{H}\}$  NMR spectrum (202 MHz) of  $[\text{Ph-PNP}]\text{Ni}(\text{NH}^t\text{Bu})$  in  $\text{C}_6\text{D}_6$  at room temperature

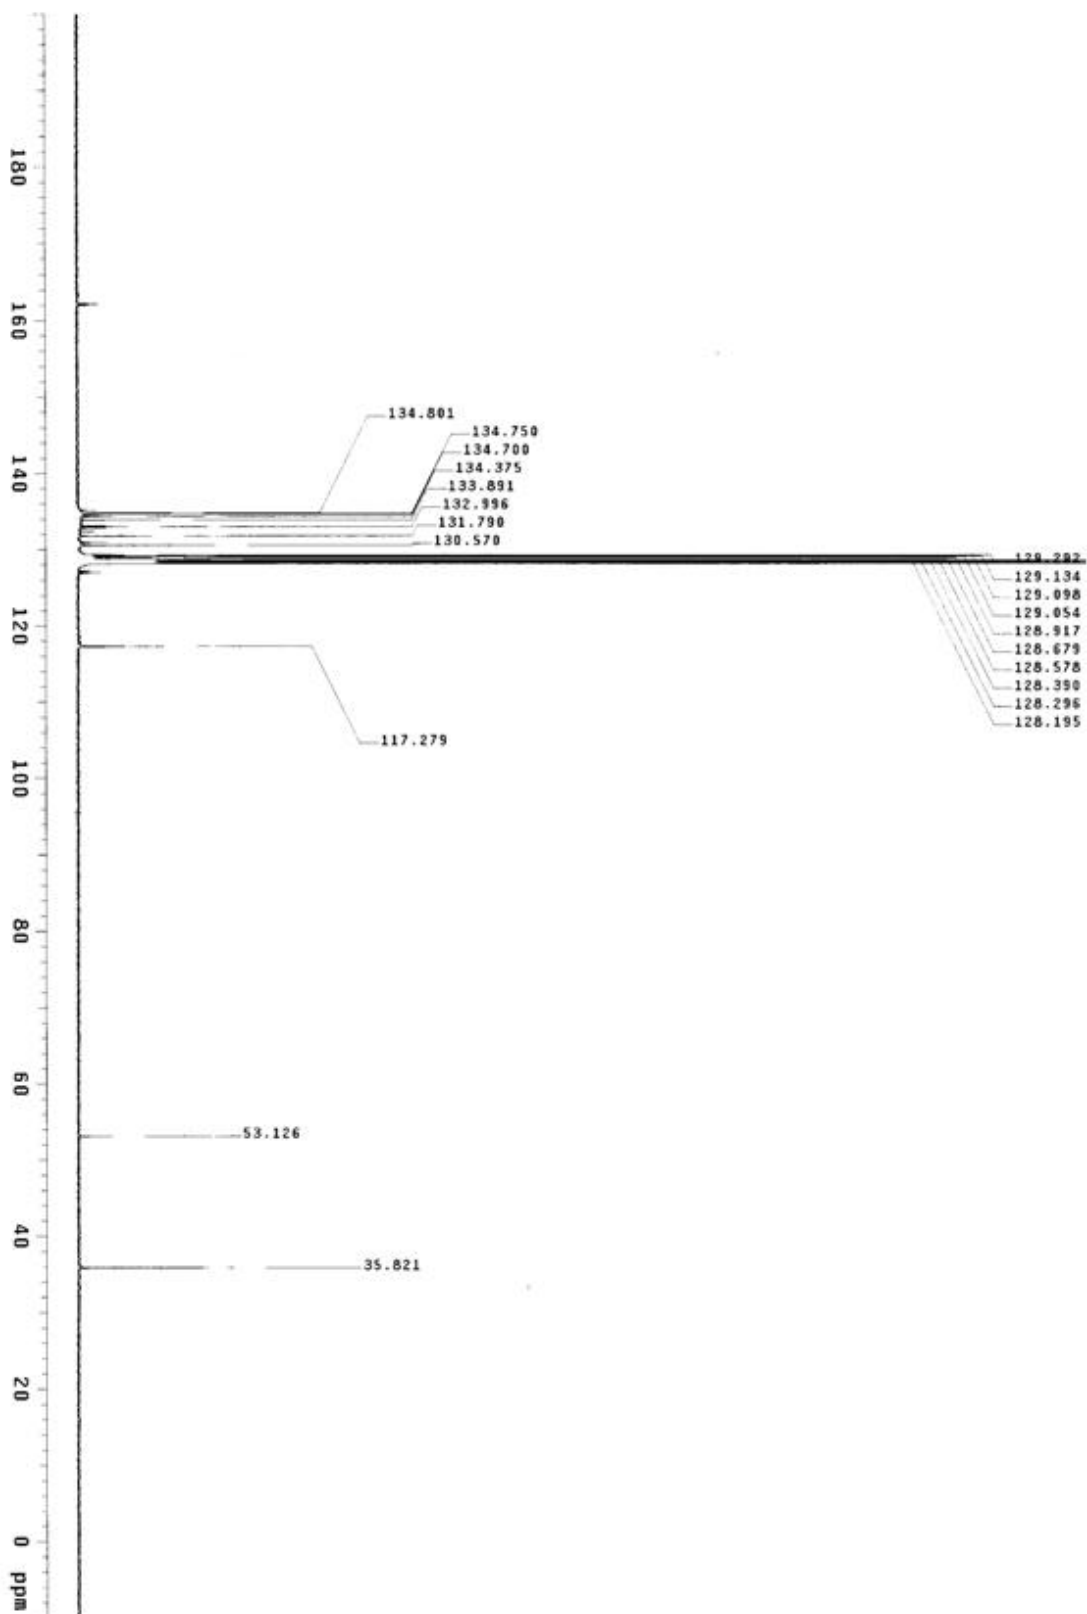

**Figure S6.**  $^{13}\text{C}\{^1\text{H}\}$  NMR spectrum (125.7 MHz) of  $[\text{Ph-PNP}]\text{Ni}(\text{NH}^t\text{Bu})$  in  $\text{C}_6\text{D}_6$  at room temperature

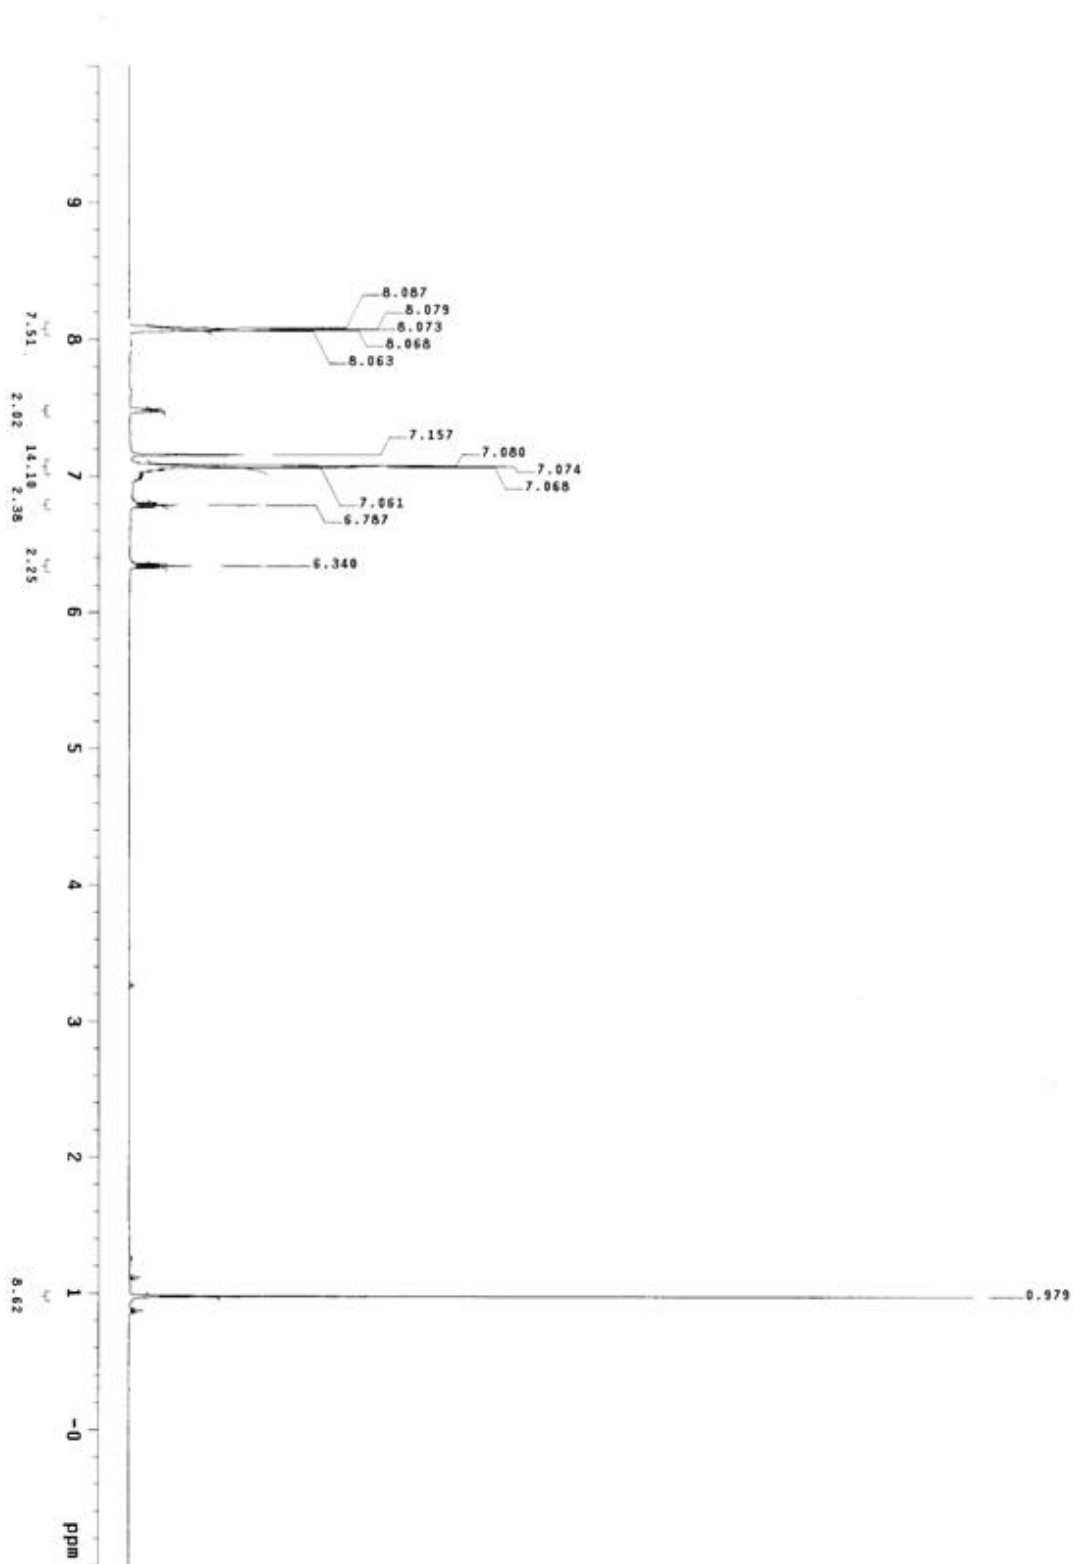

**Figure S7.** <sup>1</sup>H NMR spectrum (500 MHz) of [Ph-PNP]Ni(O<sup>t</sup>Bu) in C<sub>6</sub>D<sub>6</sub> at room temperature



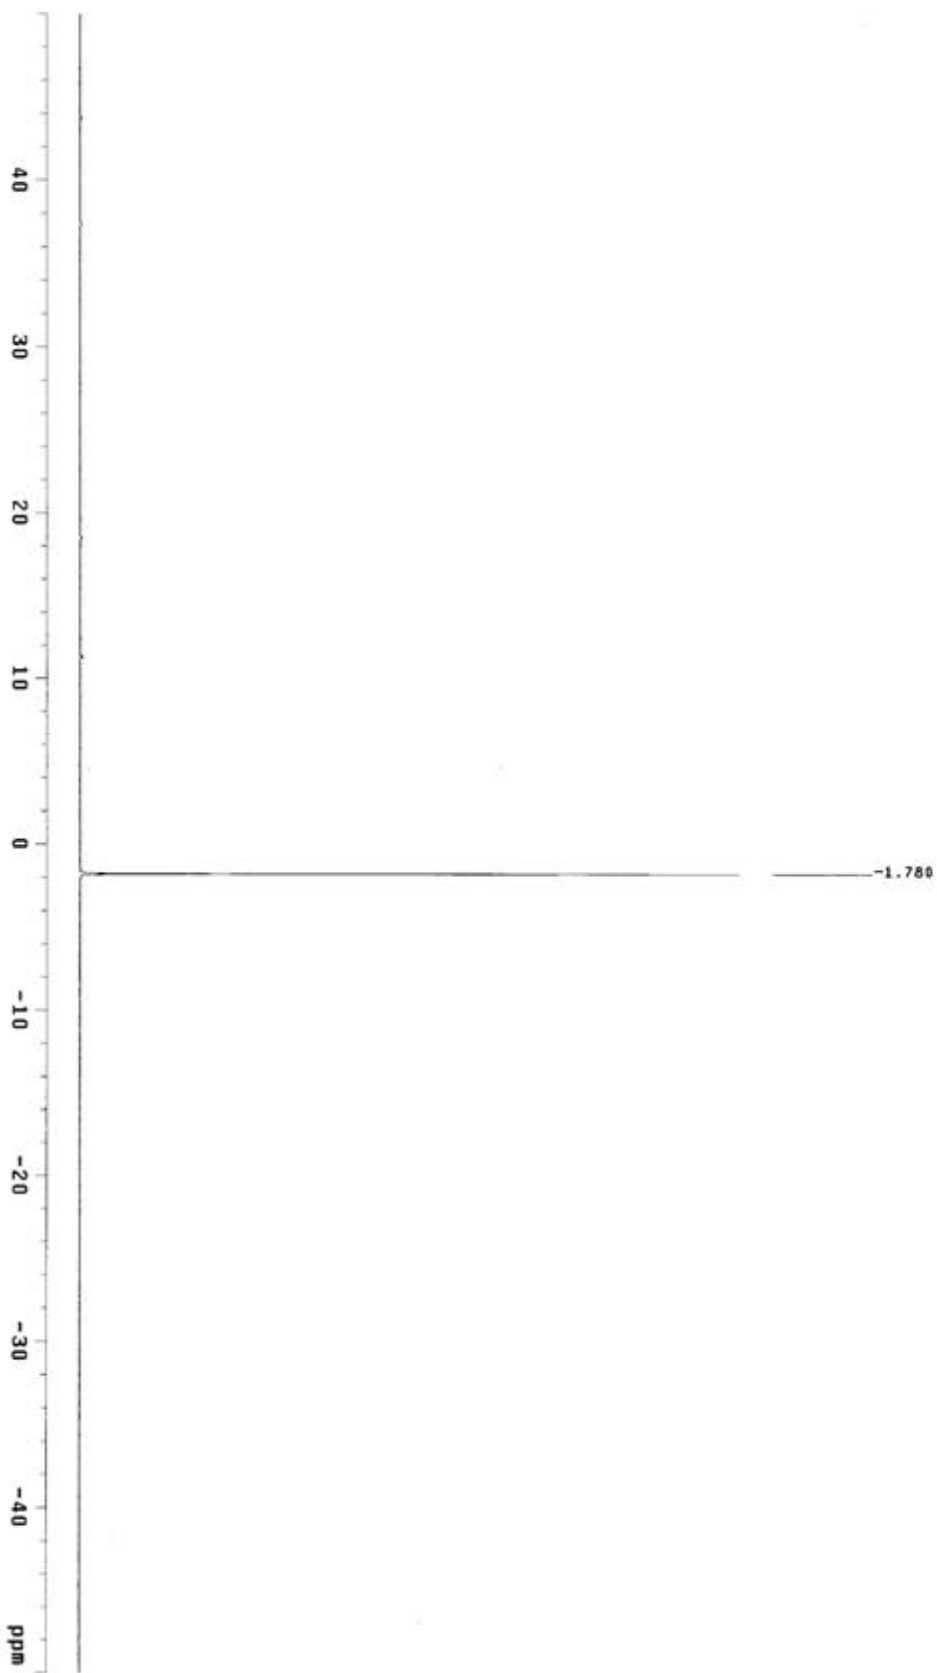

**Figure S8.**  $^{31}\text{P}$   $\{^1\text{H}\}$  NMR spectrum (202 MHz) of  $[\text{Ph-PNP}]\text{Ni}(\text{O}^t\text{Bu})$  in  $\text{C}_6\text{D}_6$  at room temperature

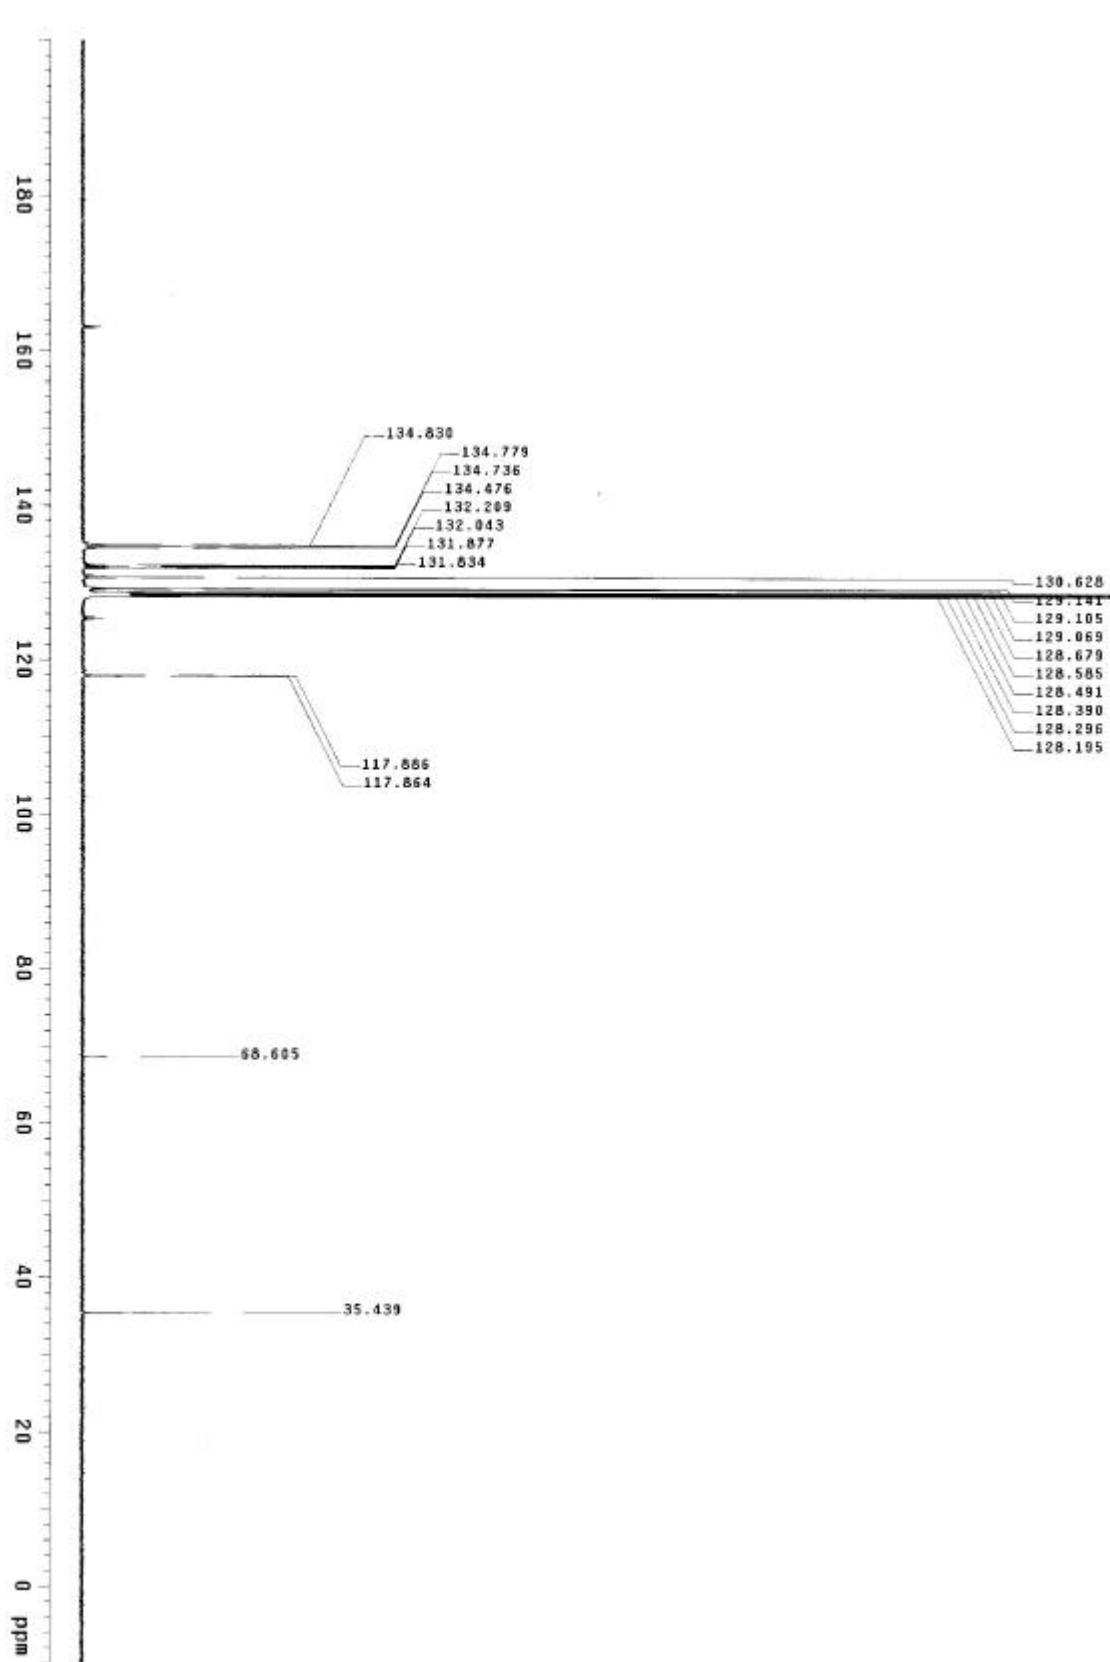

**Figure S9.**  $^{13}\text{C}\{^1\text{H}\}$  NMR spectrum (125.7 MHz) of  $[\text{Ph-PNP}]\text{Ni}(\text{O}^t\text{Bu})$  in  $\text{C}_6\text{D}_6$  at room temperature
